# Supplementary material for: Inhibition of GCN2 Reveals Synergy with Cell-Cycle Regulation and Proteostasis
Source: Preprints.org preprint supplement (doi:10.20944/preprints202309.0187.v1), 2023-09-05

## Fig. S2 Evaluation of synergism

- Experimental and approved drugs (EAD) at the concentration listed in Table 2 were incubated with cells alone or in combination with 3  $\mu$ M TAP20. The effect of TAP20 alone is indicated by the red dashed line. Confluence was measured in all wells when controls reached >90% confluence. Significant differences of growth are indicated by \* ( $p < 0.05$ ), \*\* ( $p < 0.01$ ) and \*\*\* ( $p < 0.001$ ).

**CB-839**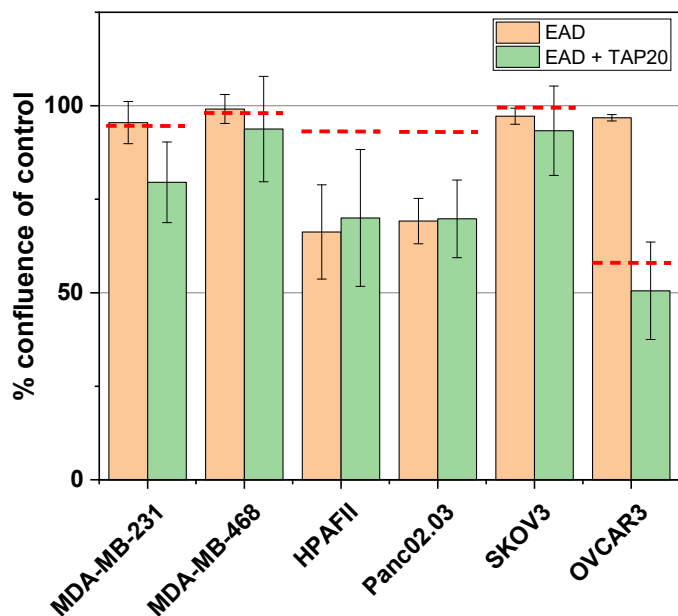**CB-5083**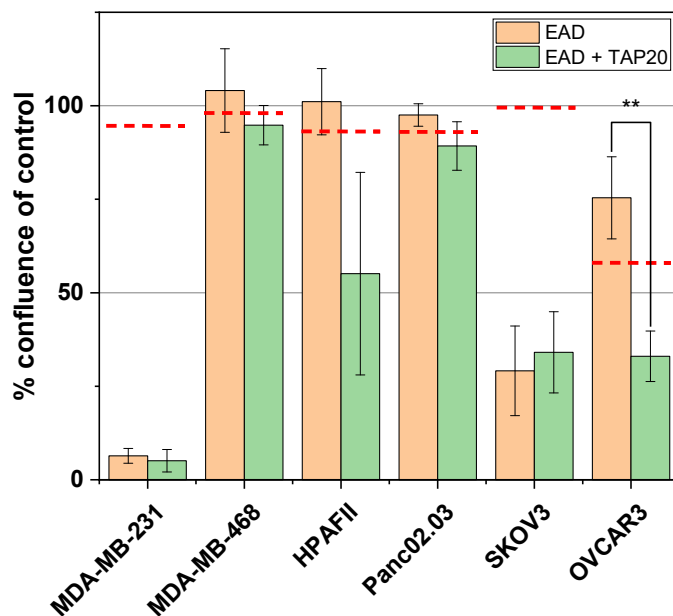**GSK2837808A**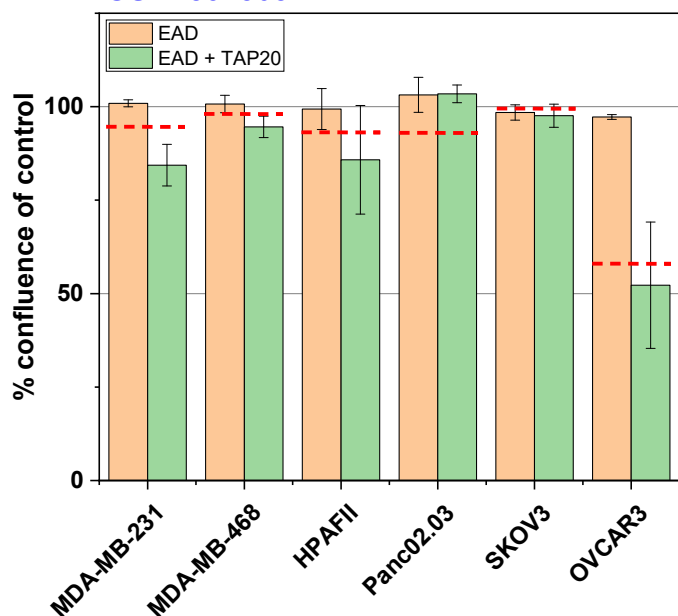**5-fluorouracil**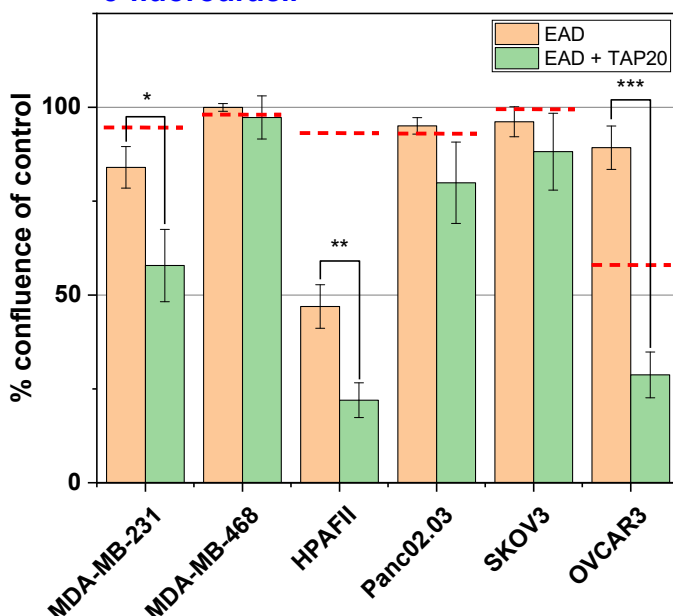**YH16899**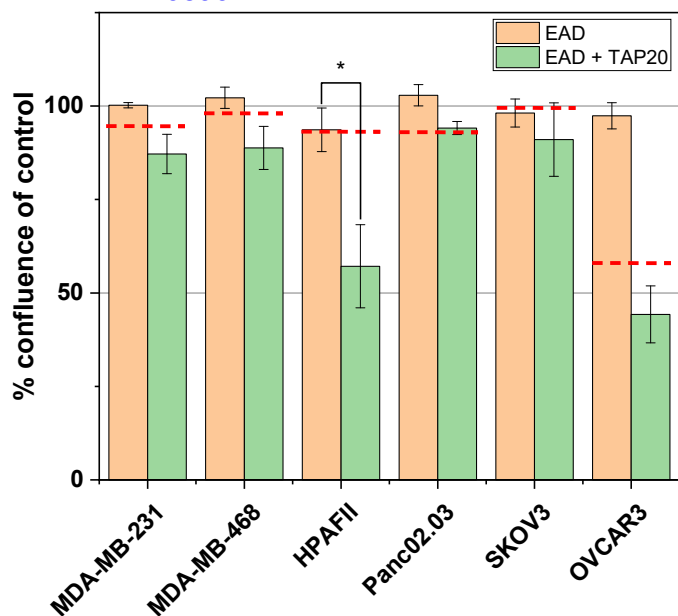**Bumetanide**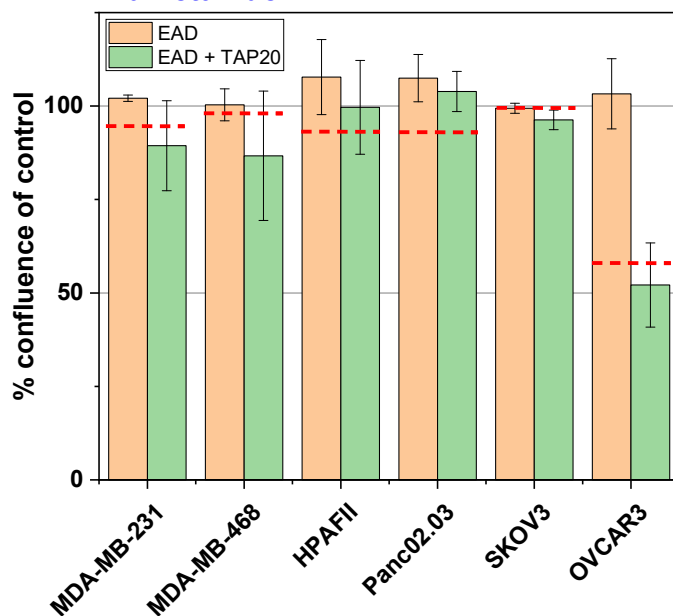

**Thapsigargin**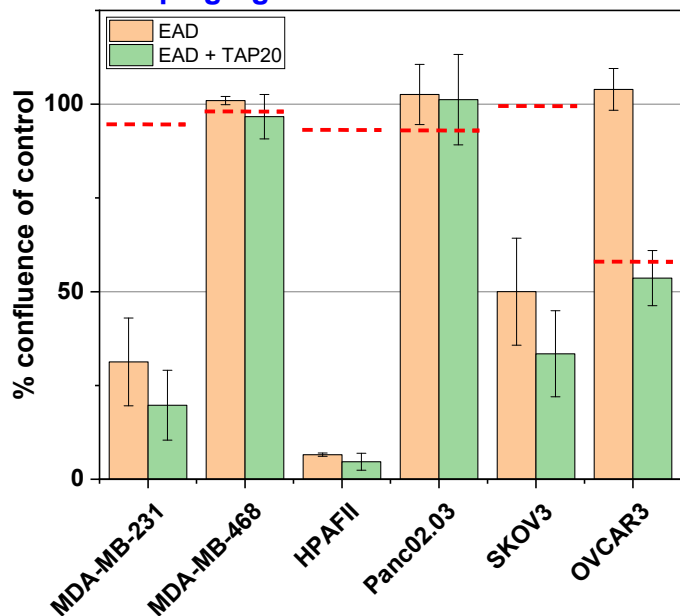**AZD3965**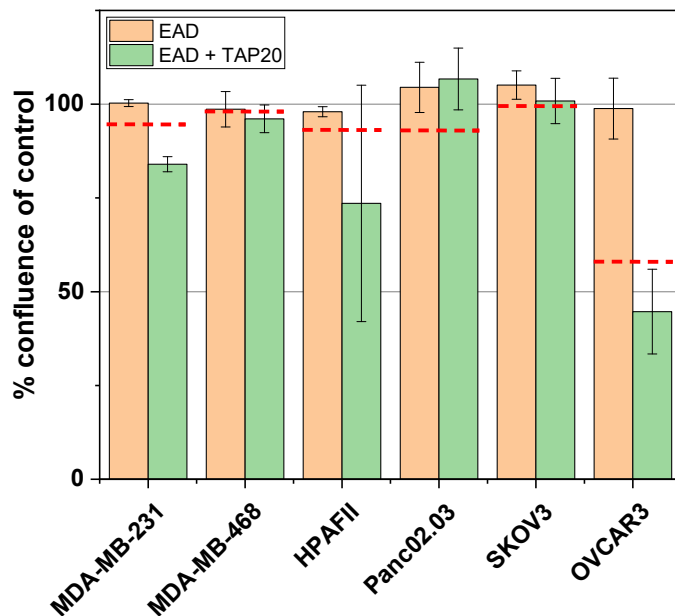**Cetuximab**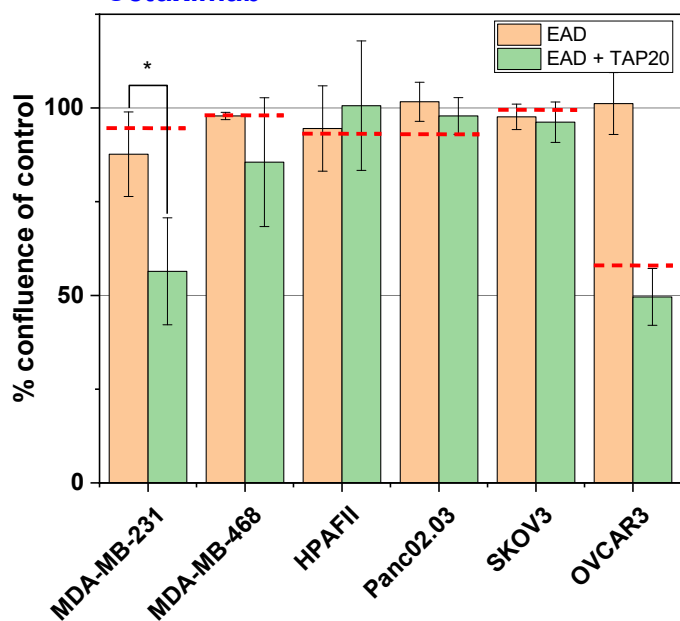**Rapamycin**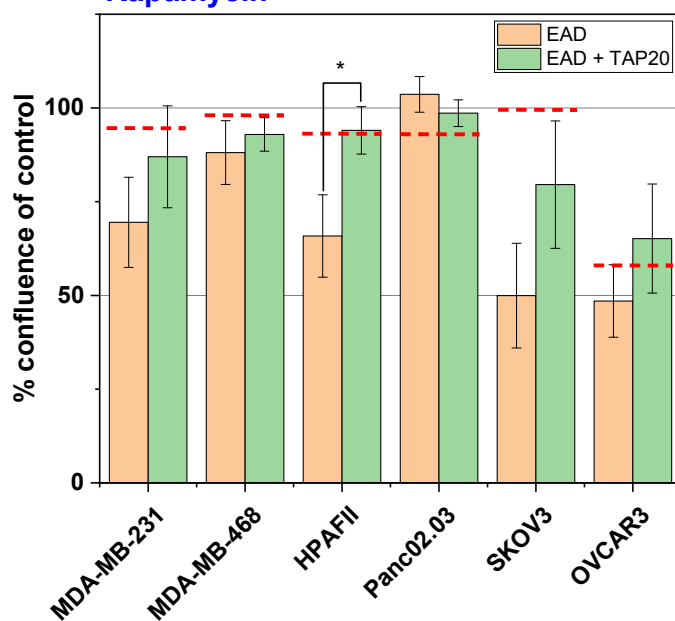**PLX8394**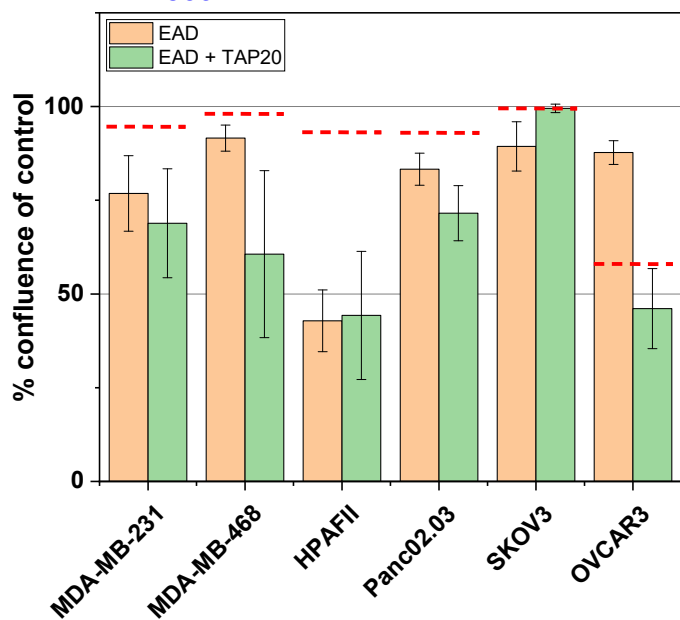**Flavopiridol**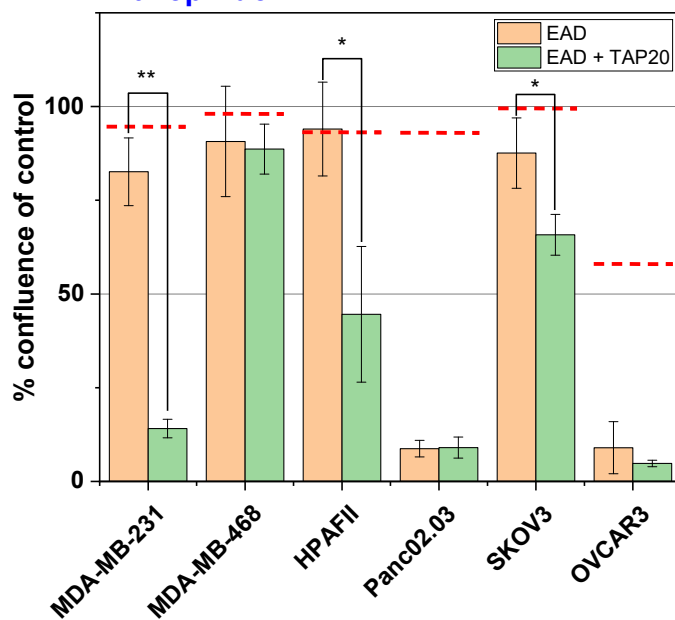

**Seliciclib**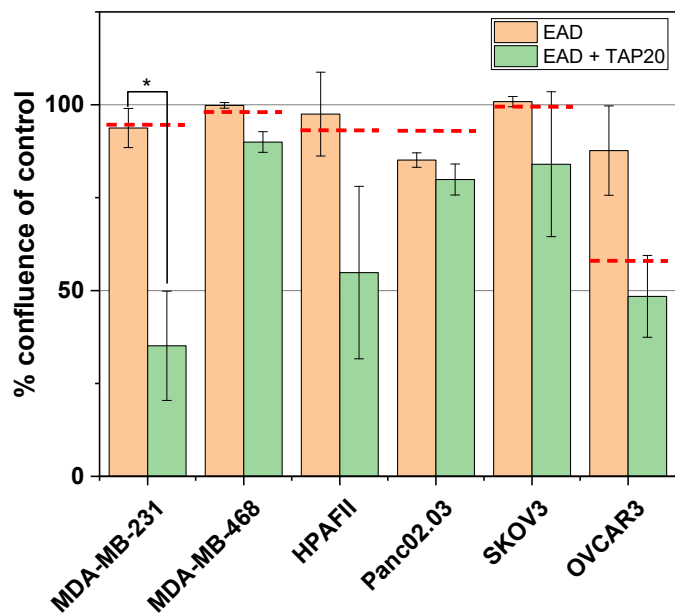**Danuserib**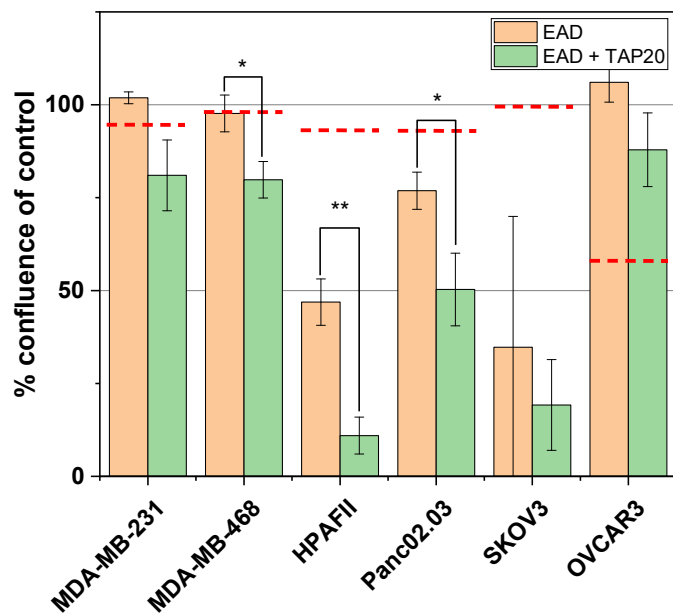**SCH772984**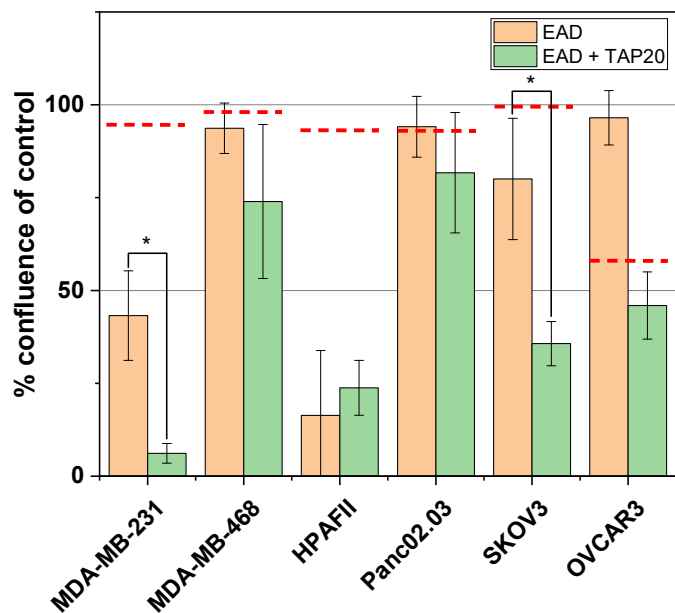**Agerafenib**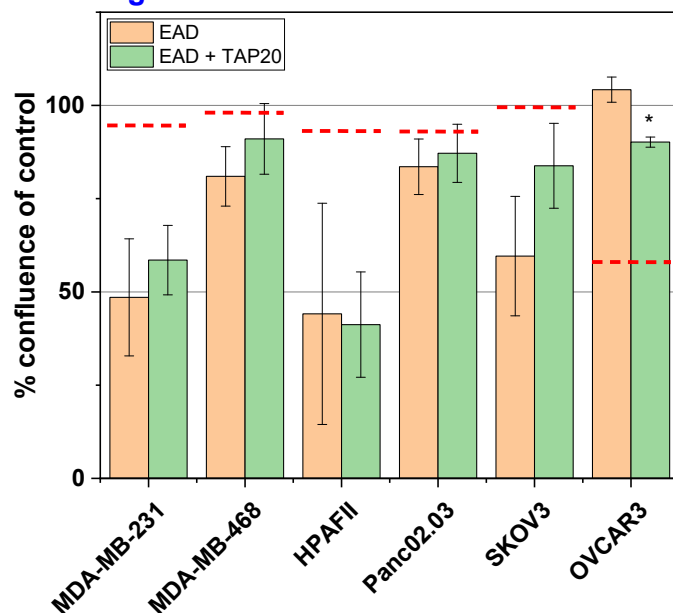**Selumetinib**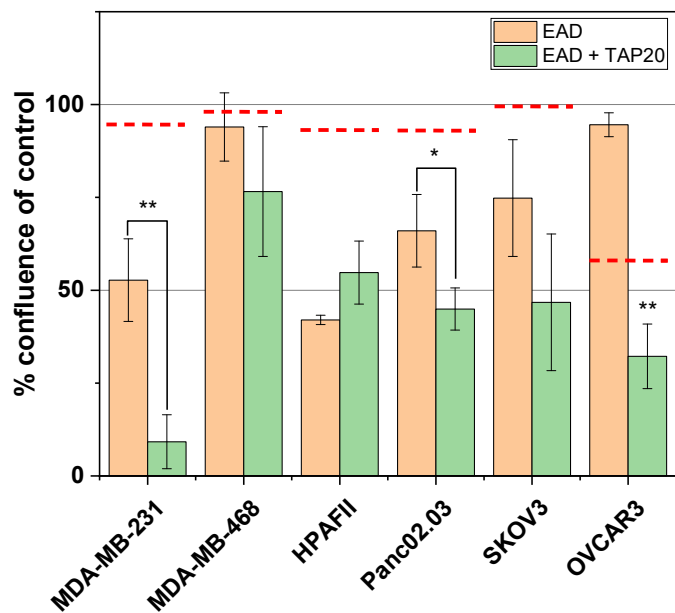**GZD824**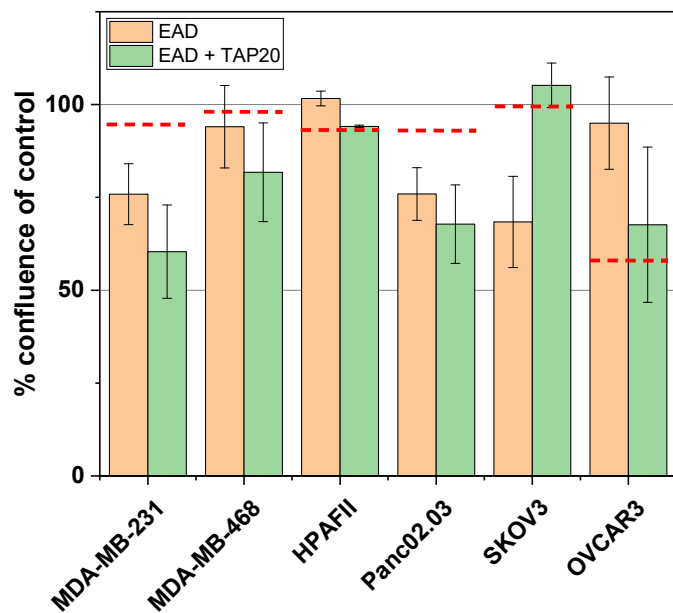

**Halofuginone**

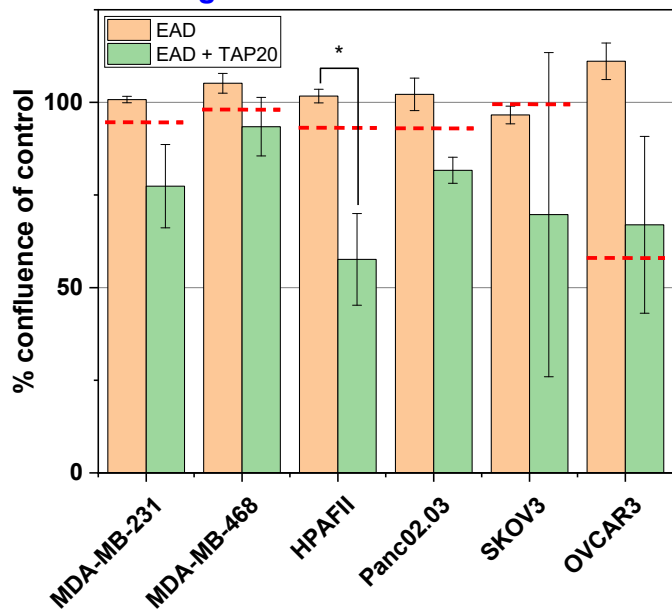

**AMG PERK 44**

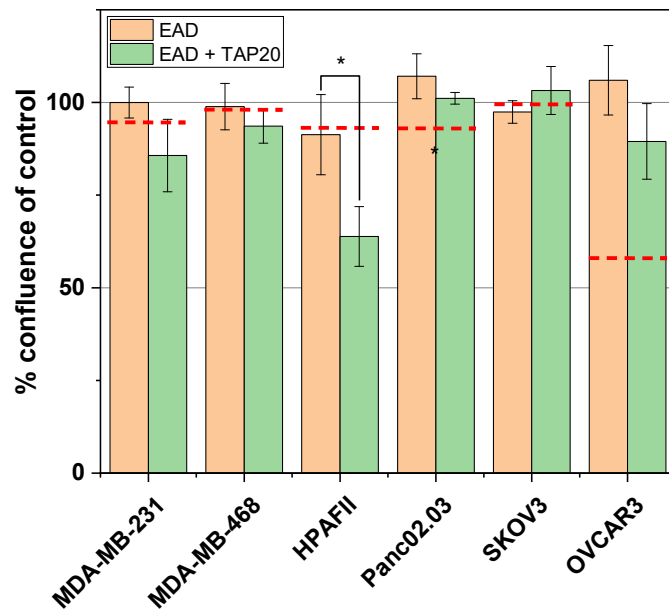

**NCT-503**

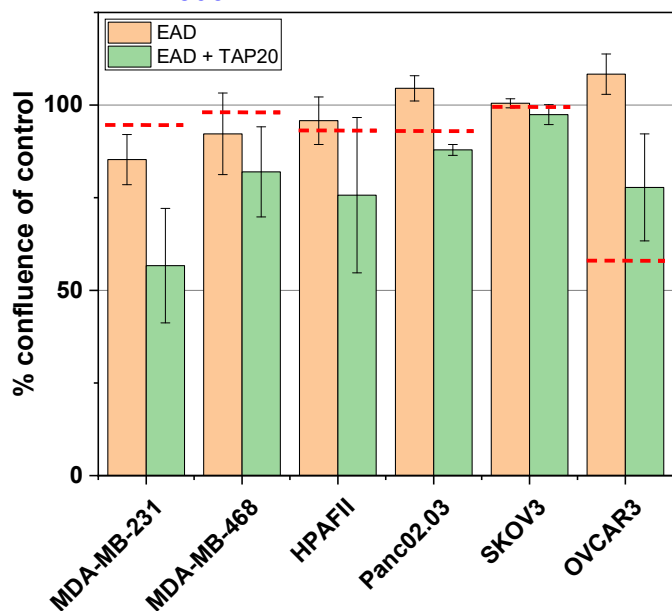

**V-9302**

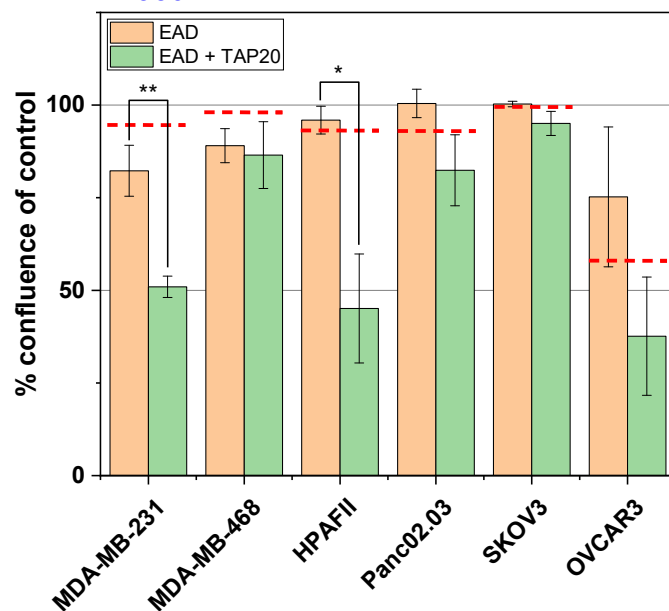

**Bortezomib**

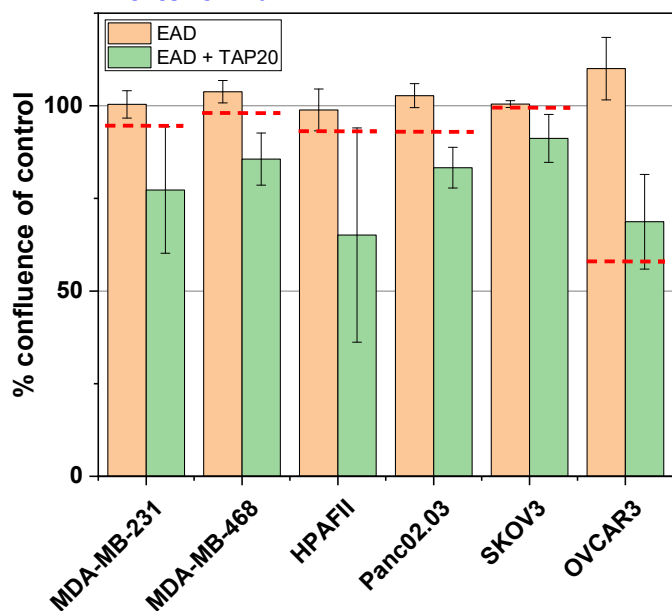

**Bay876**

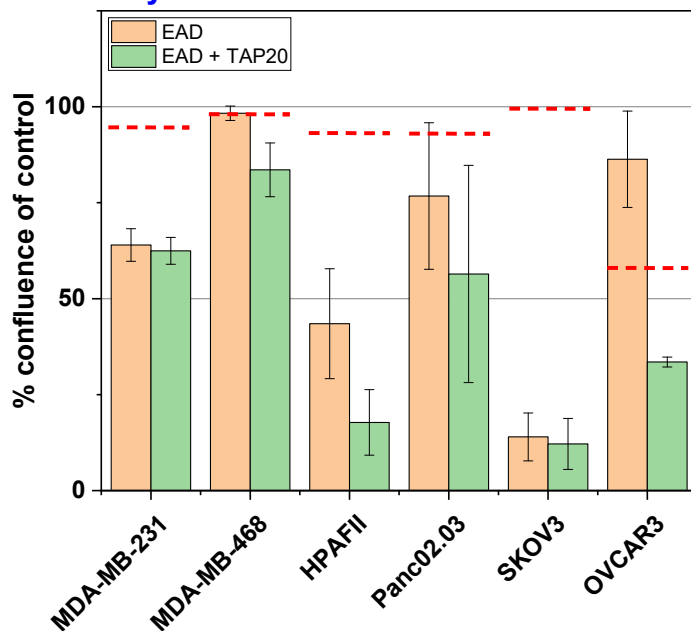

Supplement: Supplementary file 1 [file supplementary]
