# Supplementary material for: Inhibition of GCN2 Reveals Synergy with Cell-Cycle Regulation and Proteostasis
Source: Preprints.org preprint supplement (doi:10.20944/preprints202309.0187.v1), 2023-09-05

## Fig. S1:Dose-response curves for experimental anticancer drugs.

Cell growth was monitored using the IncuCyte system (Essen Biosciences). An end-point approach was adopted whereby cell confluence was measured at the end of the assay. Cells were seeded in 96-well flat-bottom plates at 3000 cells/well in growth medium and allowed to attach overnight. The next day, the growth medium from each well was replaced with 300  $\mu$ L of growth medium with or without treatment. Cells were stored in the cell incubator until untreated control cells reached >90% confluence, upon which confluence was recorded in each well. IC<sub>50</sub> curves were plotted from data obtained in this assay using the logistic growth equation.

Bay876

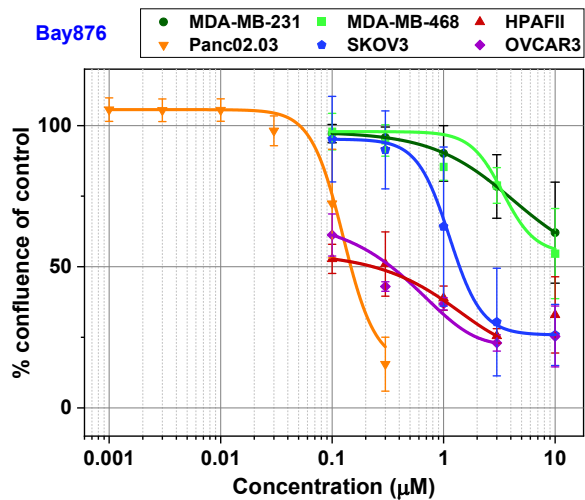

CB-839

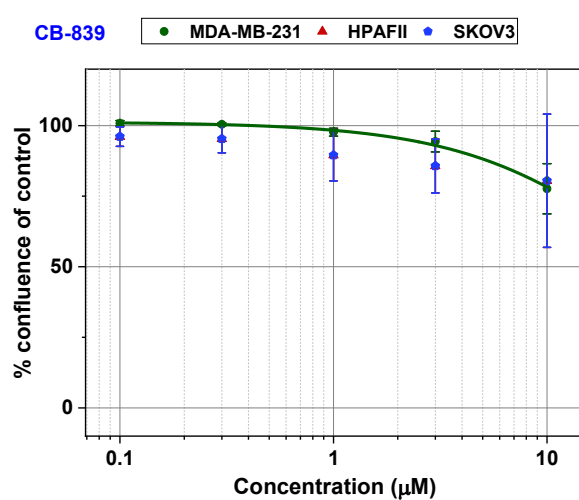

CB-5083

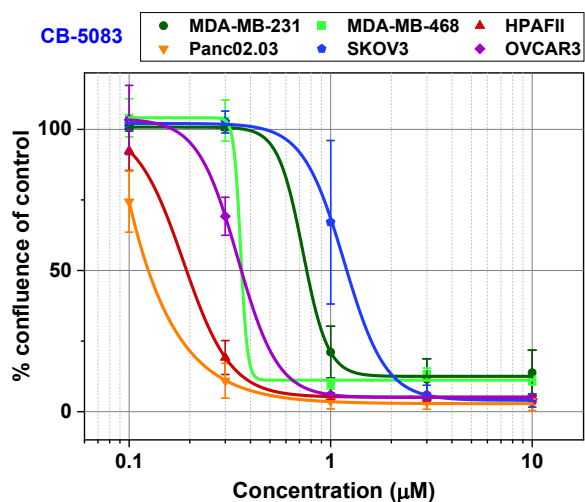

GSK2837808A

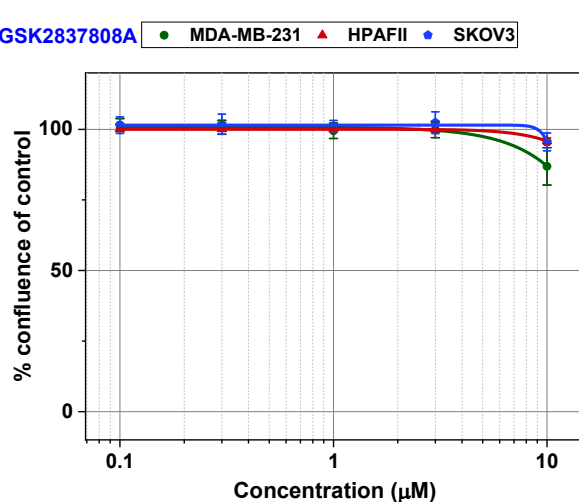

5-fluorouracil

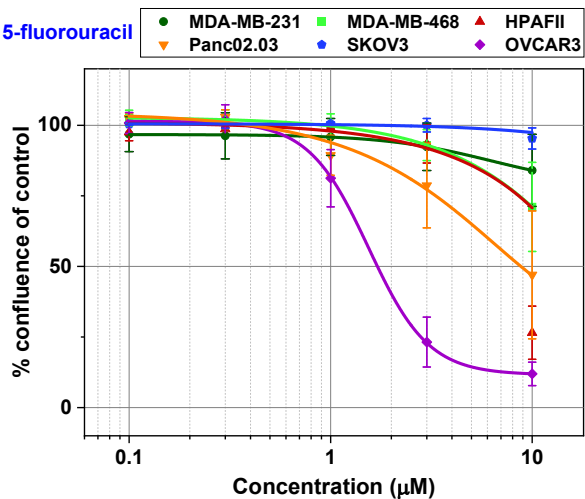

YH16899

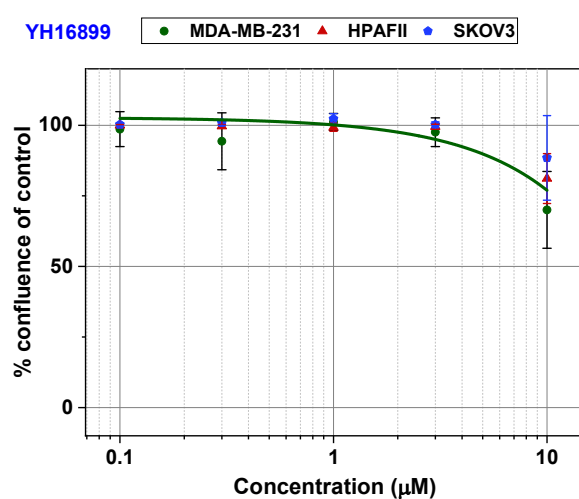

Bumetanide

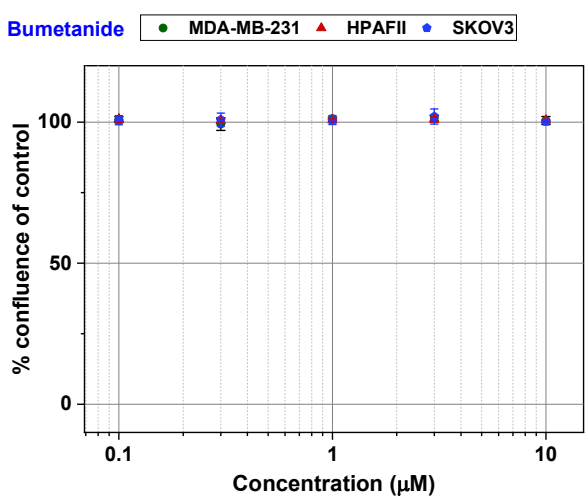

Thapsigargin

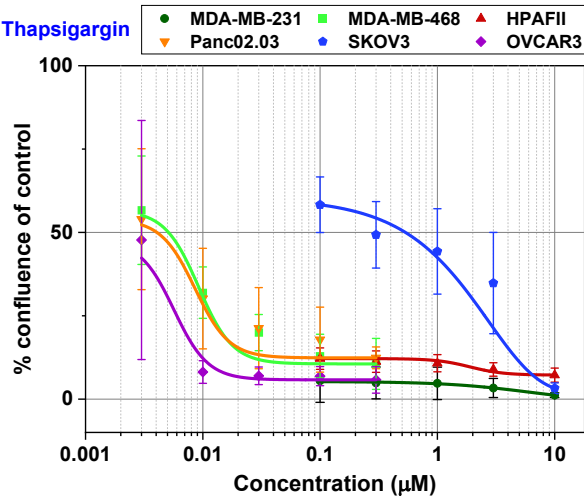

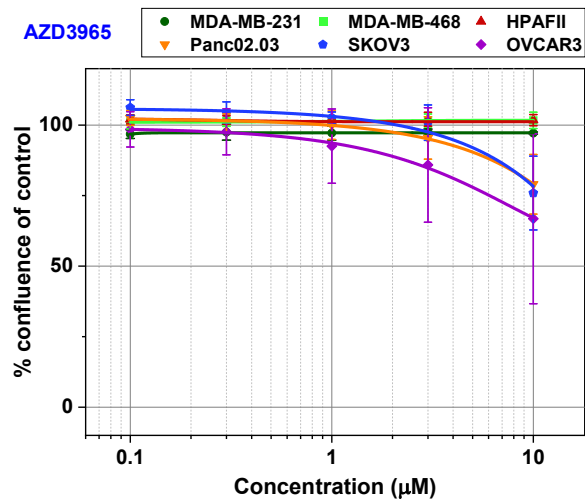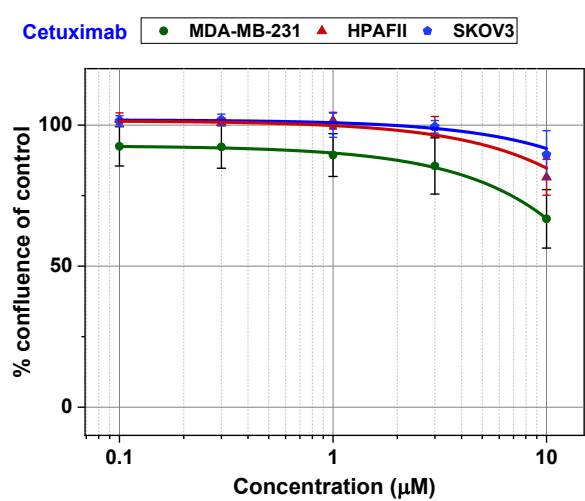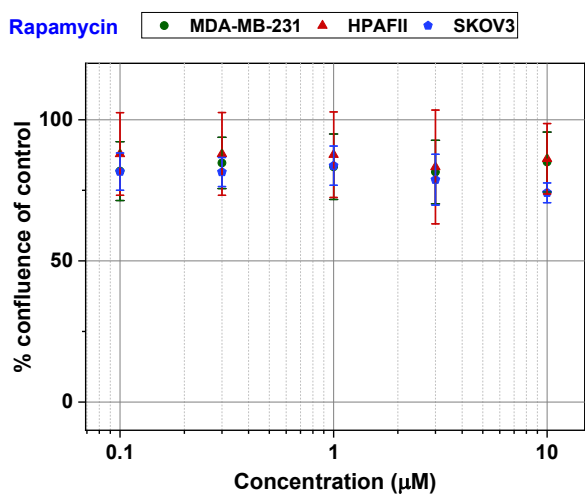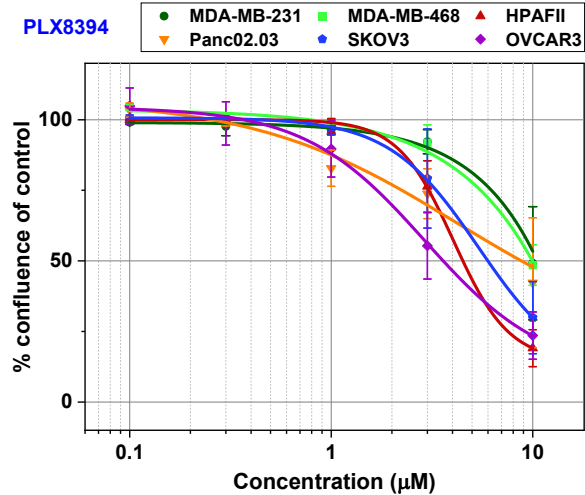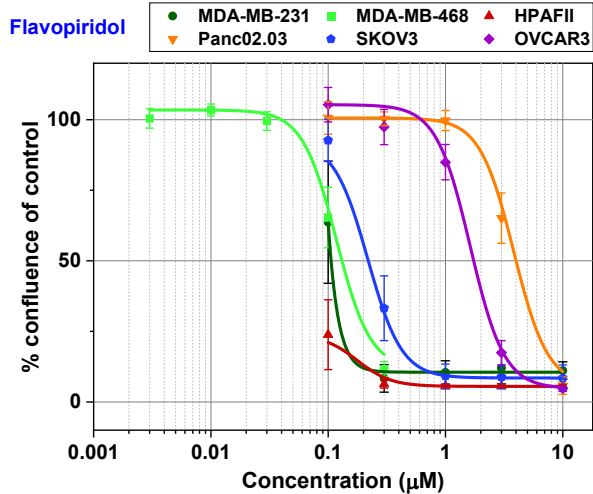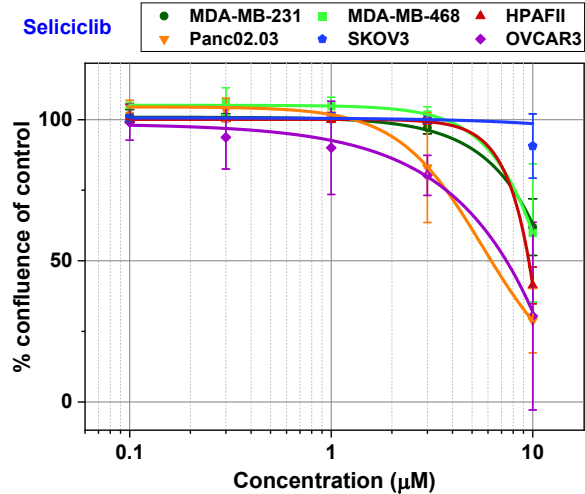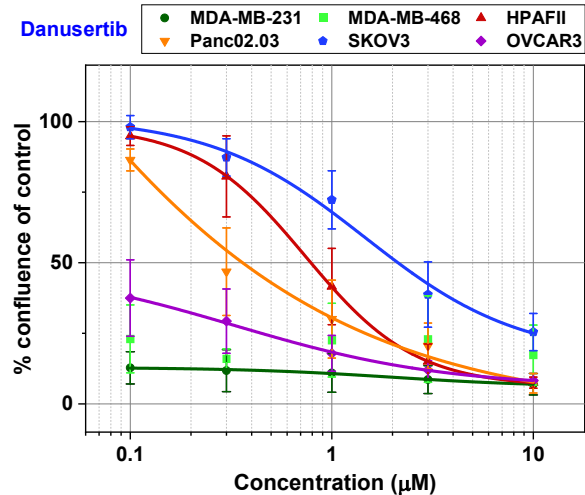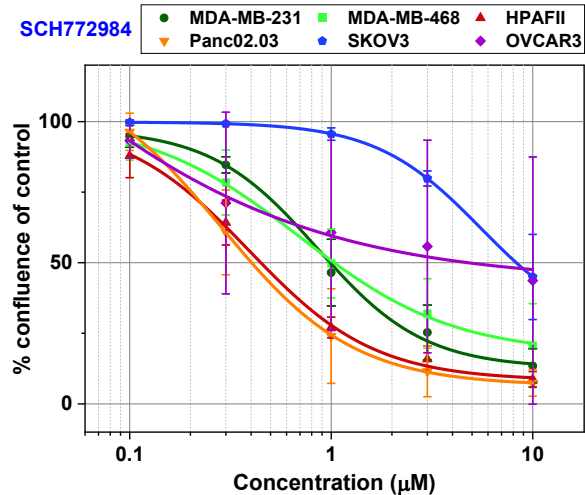

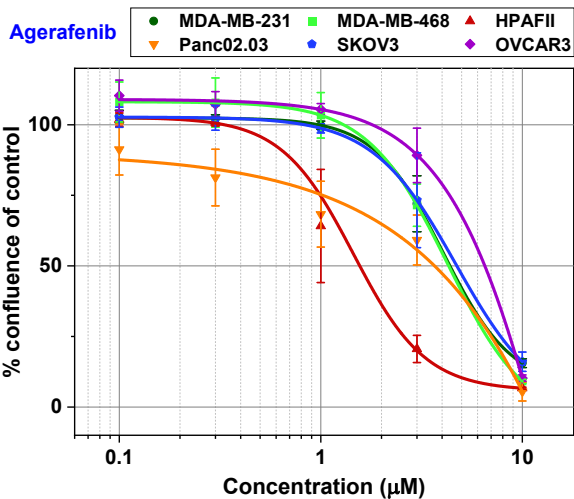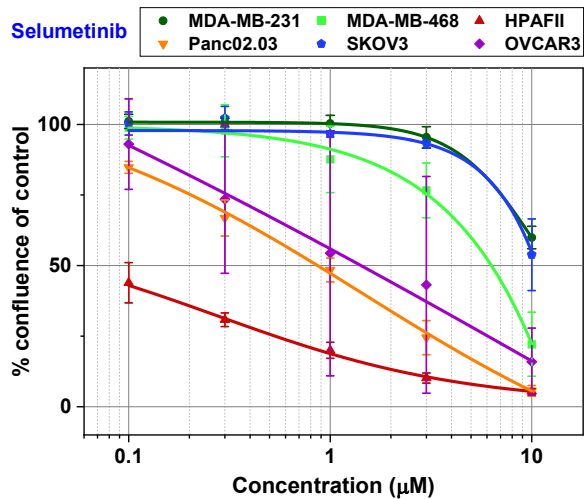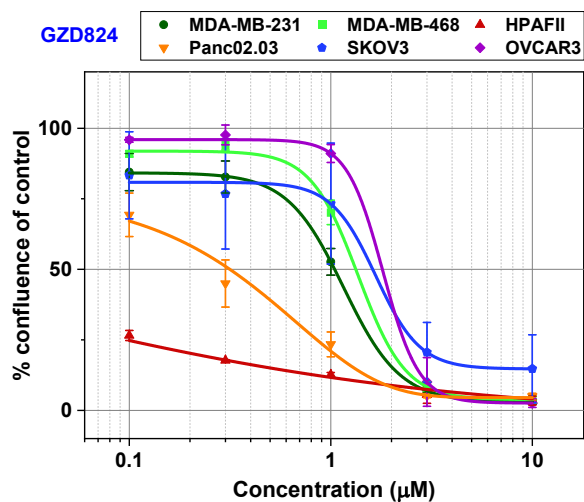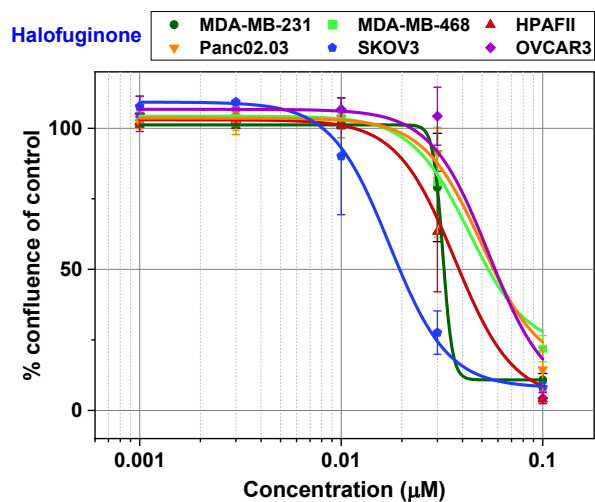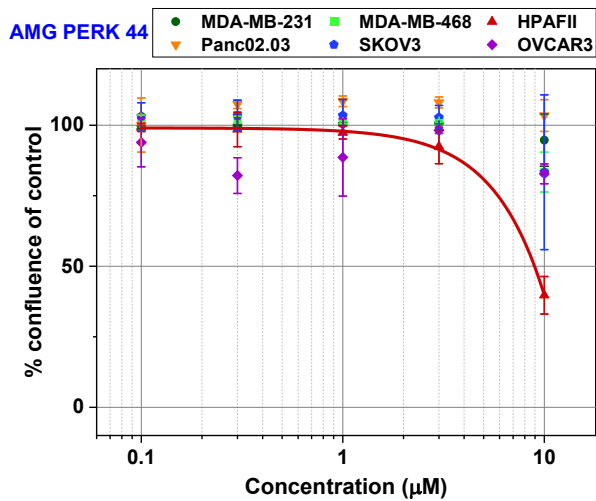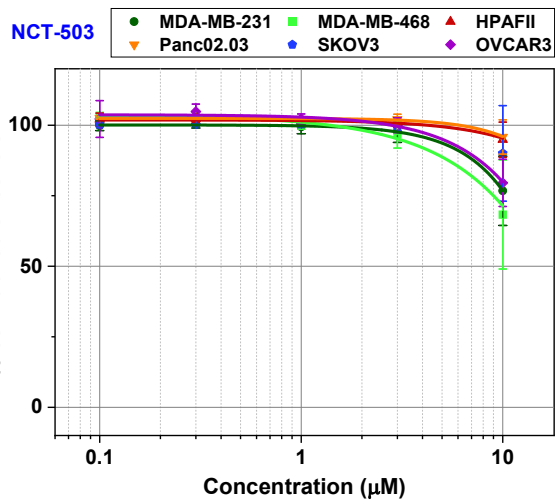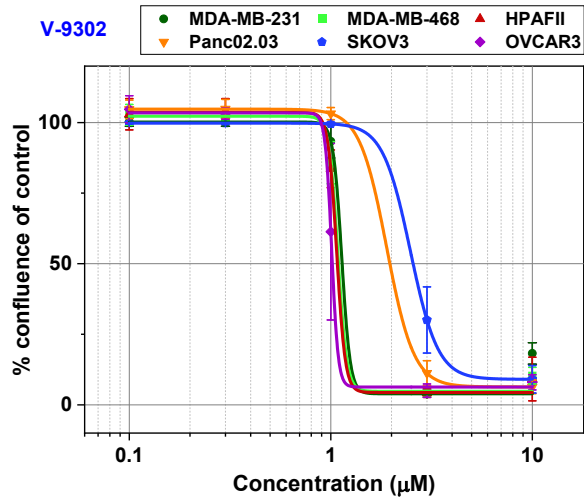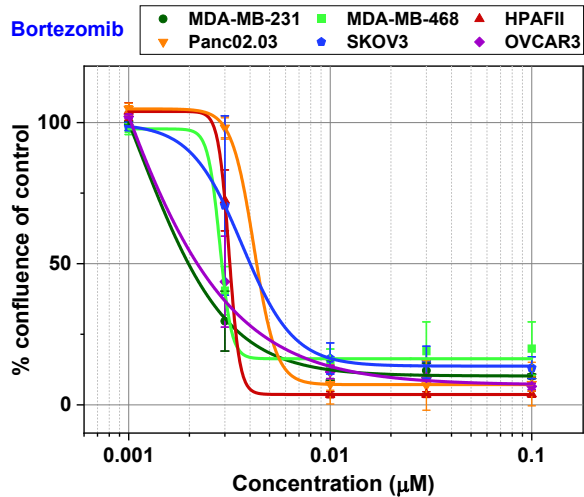

Supplement: Supplementary file 2 [file supplementary]
